# Supplementary material for: AMP1 and MP antagonistically regulate embryo and meristem development in Arabidopsis
Source: Oxford University Press journal article supplement (doi:10.1242/dev.006759), 2007-06-06
Supplement: dev006759tables1.pdf [file dev006759tables1.pdf]

**Table S1. Molecular lesions and phenotypic strength of *amp1* alleles****A. Molecular lesions of *amp1* alleles**

| Mutant         | Origin                 | Ecotype | Position* | Sequence change                  | Mutagen <sup>†</sup> |
|----------------|------------------------|---------|-----------|----------------------------------|----------------------|
| <i>amp1-1</i>  | Chaudhury et al., 1993 | Col     | 2225 bp   | G to A (Stop)                    | EMS                  |
| <i>amp1-8</i>  | This work              | Ler     | 976 bp    | C to T (Stop)                    | EMS                  |
| <i>amp1-9</i>  | This work              | Ler     | 1434 bp   | G to A (3' acceptor splice site) | EMS                  |
| <i>amp1-10</i> | This work              | Col     | 1112 bp   | SALK_021406                      | T-DNA                |
| <i>amp1-11</i> | This work              | Col     | 1129 bp   | SALK_038402                      | T-DNA                |
| <i>amp1-12</i> | This work              | Col     | 1133 bp   | SALK_044086                      | T-DNA                |
| <i>amp1-13</i> | This work              | Col     | 2461 bp   | SALK_022988                      | T-DNA                |

\*The origin of mutation was mapped by PCR. The full-length *AMP1* genomic sequence is 2964 bp in length and comprises 10 exons.

<sup>†</sup>EMS, ethylmethanesulfonate; T-DNA, insertion of T-DNA.

**B. Phenotypic strength of *amp1* alleles**

| Genotype       | <i>n</i> | Monocot % | Fused <sup>‡</sup> % | Dicot % | Tricot % | Tetracot % | Pentacot % | Collar <sup>§</sup> % | Twin <sup>¶</sup> % |
|----------------|----------|-----------|----------------------|---------|----------|------------|------------|-----------------------|---------------------|
| Col-0          | 169      |           |                      | 100     |          |            |            |                       |                     |
| <i>amp1-1</i>  | 172      |           | 1.7                  | 76.1    | 21.5     | 0.6        |            |                       |                     |
| <i>amp1-12</i> | 167      | 0.6       | 6.0                  | 50.3    | 37.7     | 3.0        |            | 1.8                   | 0.6                 |
| <i>amp1-13</i> | 154      | 0.6       | 10.4                 | 46.1    | 39.6     | 1.9        |            | 0.6                   | 0.6                 |
| <i>amp1-10</i> | 130      | 0.7       | 14.6                 | 44.6    | 36.1     | 0.7        |            | 3.1                   |                     |
| <i>amp1-11</i> | 147      | 2.7       | 10.2                 | 41.5    | 44.2     | 0.7        |            |                       | 0.7                 |
| Ler            | 167      |           |                      | 100     |          |            |            |                       |                     |
| <i>amp1-8</i>  | 189      |           | 3.1                  | 60.8    | 34.9     | 1.1        |            |                       |                     |
| <i>amp1-9</i>  | 213      | 0.5       | 5.1                  | 48.3    | 39.2     | 6.1        |            | 0.5                   |                     |
| <i>pt</i>      | 198      | 0.5       | 2.5                  | 48.4    | 45.5     | 2.5        | 0.5        | 0.5                   |                     |

The phenotypic spectrum of cotyledon number indicates which *amp1* alleles are considered weak and strong, increasing in severity as the number of cotyledons increase. Seedlings were classified at 5 DAG. The *amp1-1* allele displays milder defects, which is consistent with the residual *AMP1* gene activity in this allele.

*pt*, Primordia timing.

<sup>‡</sup>Fused cotyledons have one or more fused cotyledons.

<sup>§</sup>Collar seedlings form a continuous ring of tissue surrounding the SAM.

<sup>¶</sup>Twin seedlings develop more than one embryo from a single seed coat.
